# Supplementary material
Source: Springer Nature journal article supplement (https://www.springermedizin.de/resource/supplementary/12876_2011_656_MOESM5_ESM.pdf/9437188)

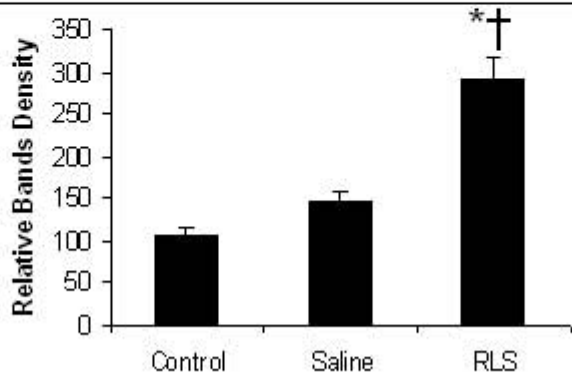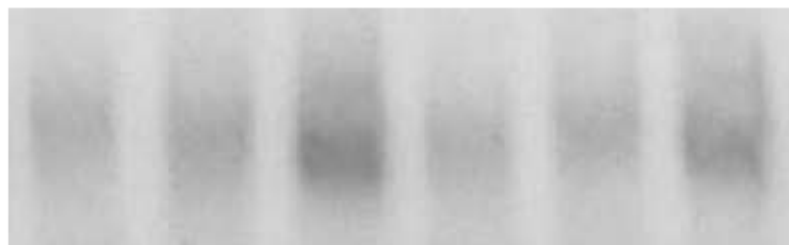

Con-1 Saline-1 RLS-1 Con-2 saline-2 RLS-2

Supplement: MOESM5 [file 9437188]
